# Supplementary material for: Acquired HIV drug resistance and virologic monitoring in a HIV hyper-endemic setting in KwaZulu-Natal Province, South Africa
Source: PubMed Central journal article supplement (PMC8520607; doi:10.1186/s12981-021-00393-5), 2021-10-16
Supplement: 12981_2021_393_MOESM1_ESM.pdf [file 12981_2021_393_MOESM1_ESM.pdf]

## SUPPLEMENTARY INFORMATION

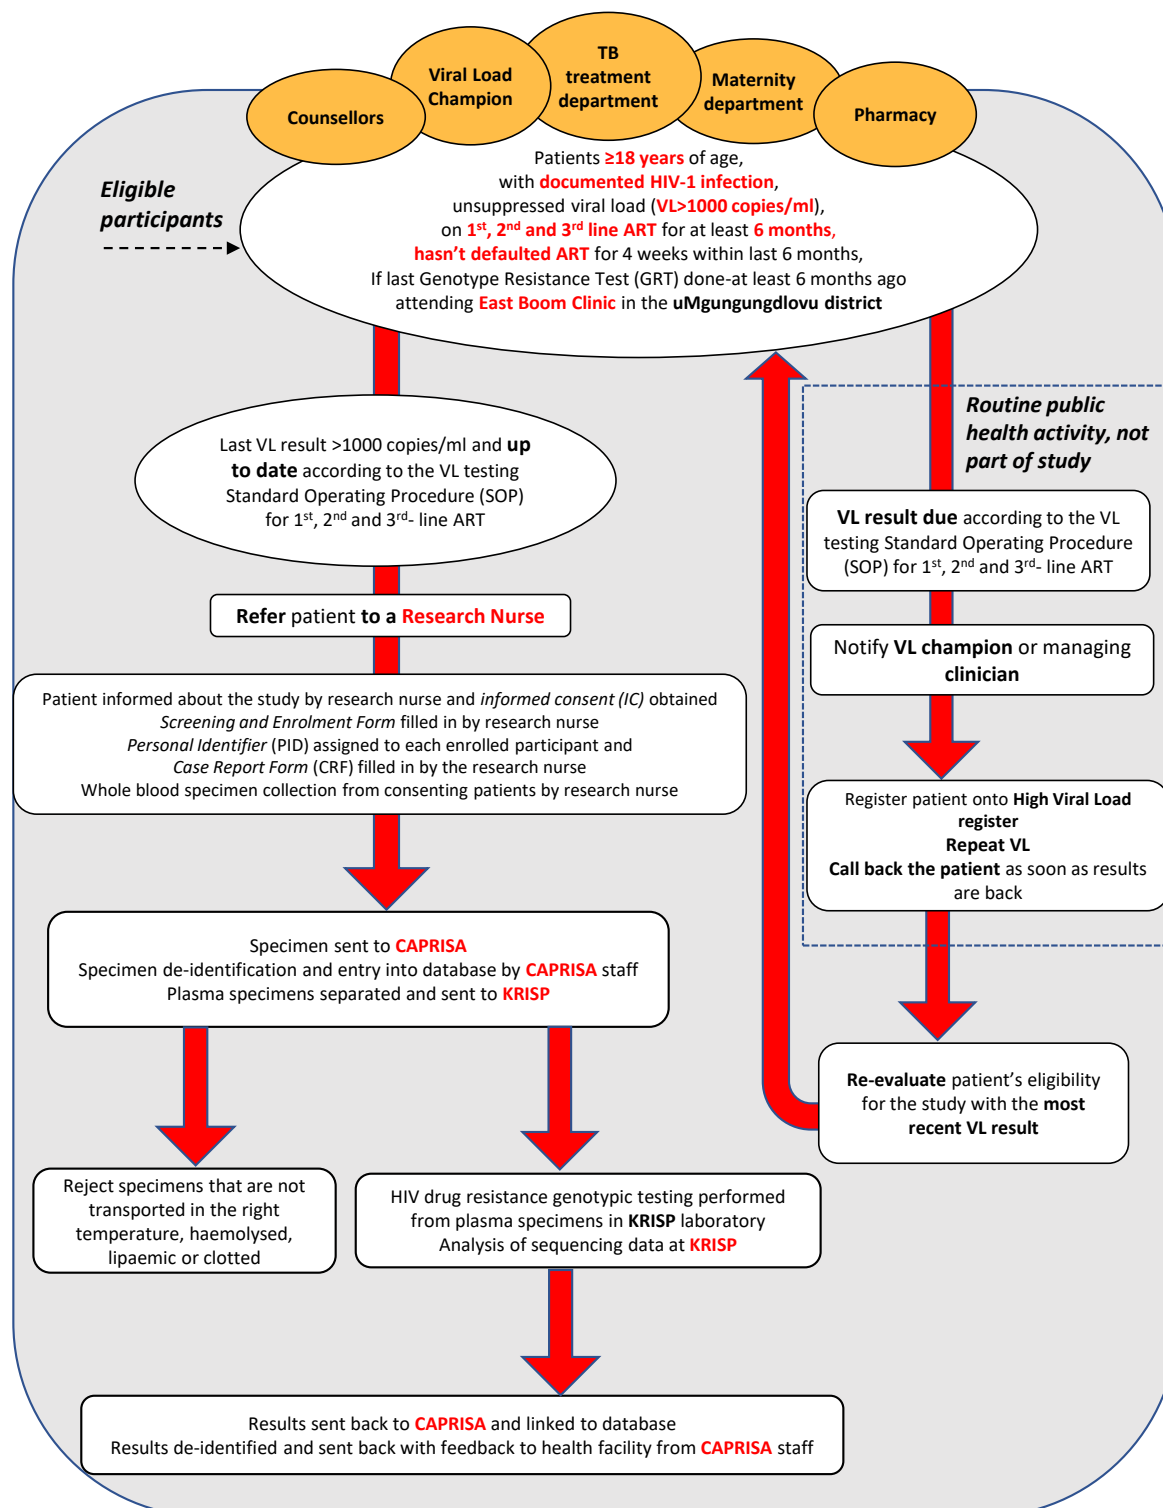

**Additional file 1: Figure S1** Study flow diagram from participant selection to reporting of results in the acquired HIV drug resistance study in KwaZulu-Natal (KZN) province, South Africa, May-September 2019

**Additional file 1: Table S1** Comparison of participant characteristics among samples excluded and included in final analysis in the acquired HIV drug resistance study in KwaZulu-Natal (KZN) province, South Africa, May-September 2019

| <b>Characteristic</b>                                  | <b>Excluded (n=28)</b> | <b>Included (n=115)</b> | <b>p-value</b> |
|--------------------------------------------------------|------------------------|-------------------------|----------------|
| Female, n (%)                                          | 14 (50)                | 62 (54)                 | 0.710          |
| Age in years, median (IQR)                             | 44 (35-50)             | 38 (30-46)              | 0.011          |
| Viral load (log <sub>10</sub> copies/mL), median (IQR) | 3.2 (3.0-3.6)          | 4.3 (3.7-4.9)           | <0.001         |
| CD4 count (cells/mm <sup>3</sup> ), median (IQR)       | 529 (193-737)          | 270 (136-394)           | 0.002          |

IQR, interquartile range; Excluded, refers to participant samples not successfully genotyped; Included, refers to participant samples that were successfully genotyped by Sanger sequencing and included in final analysis

**Additional file 1: Table S2** Patterns of drug class resistance among participants on first- and second-line ART in the acquired HIV drug resistance study in KwaZulu-Natal (KZN) province, South Africa, May-September 2019

| <b>ART regimen</b>              | <b>n (%)</b> |
|---------------------------------|--------------|
| <b>First-line ART (n = 70)</b>  |              |
| <i>Single class resistance</i>  | 3 (4.29)     |
| <i>Dual class resistance</i>    | 62 (88.57)   |
| <i>Triple class resistance</i>  | 0 (0.0)      |
| <b>Second-line ART (n = 44)</b> |              |
| <i>Single class resistance</i>  | 4 (9.09)     |
| <i>Dual class resistance</i>    | 30 (68.18)   |
| <i>Triple class resistance</i>  | 6 (13.46)    |

ART, antiretroviral therapy

**Additional file 1: Table S3** Prevalence of specific acquired drug resistance mutations in the acquired HIV drug resistance study in KwaZulu-Natal (KZN) province, South Africa, May-September 2019

| Mutation               | Percentage with specific mutations |                          |                           |
|------------------------|------------------------------------|--------------------------|---------------------------|
|                        | Overall, n (%)                     | First-line ART, (n = 70) | Second-line ART, (n = 44) |
| <b>NNRTI mutations</b> |                                    |                          |                           |
| <i>k103ns</i>          | 68 (59.13)                         | 64.29                    | 50.0                      |
| <i>v106aimt</i>        | 36 (31.30)                         | 42.86                    | 13.64                     |
| <i>g190aeq</i>         | 25 (21.47)                         | 22.86                    | 20.46                     |
| <i>v108i</i>           | 17 (14.78)                         | 15.71                    | 13.64                     |
| <i>p225hr</i>          | 17 (14.78)                         | 11.43                    | 18.18                     |
| <i>k101ehp</i>         | 16 (13.91)                         | 17.14                    | 9.09                      |
| <i>y181ci</i>          | 14 (12.17)                         | 12.86                    | 9.09                      |
| <i>v179dflt</i>        | 12 (10.44)                         | 11.43                    | 9.09                      |
| <i>e138agkq</i>        | 11 (9.57)                          | 10.0                     | 9.09                      |
| <i>y188cl</i>          | 10 (8.70)                          | 7.14                     | 11.36                     |
| <i>a98g</i>            | 9 (7.83)                           | 2.86                     | 15.9                      |
| <i>l100i</i>           | 8 (6.96)                           | 8.57                     | 4.55                      |
| <i>h221y</i>           | 8 (6.96)                           | 5.71                     | 9.09                      |
| <i>f227cl</i>          | 6 (5.22)                           | 7.14                     | 2.27                      |
| <i>m230l</i>           | 5 (4.35)                           | 5.71                     | 2.27                      |
| <i>l234i</i>           | 1 (0.87)                           | 1.43                     | 0                         |
| <b>NRTI mutations</b>  |                                    |                          |                           |
| <i>m184iv</i>          | 92 (80.0)                          | 84.29                    | 75.0                      |
| <i>k65enr</i>          | 39 (33.91)                         | 44.29                    | 18.18                     |
| <i>y115f</i>           | 14 (12.17)                         | 15.71                    | 6.82                      |
| <i>a62v</i>            | 13 (11.30)                         | 15.71                    | 4.55                      |
| <i>l74vi</i>           | 10 (8.70)                          | 11.43                    | 4.55                      |
| <i>k70e</i>            | 9 (7.83)                           | 10.0                     | 4.55                      |
| <b>TAMs</b>            |                                    |                          |                           |
| <i>k219qer</i>         | 30 (26.09)                         | 28.57                    | 20.46                     |
| <i>d67n</i>            | 25 (21.74)                         | 28.57                    | 11.36                     |
| <i>k70r</i>            | 10 (8.70)                          | 8.57                     | 9.09                      |
| <i>m41l</i>            | 9 (7.83)                           | 4.29                     | 11.36                     |
| <i>t215insyf</i>       | 6 (5.22)                           | 2.86                     | 6.82                      |
| <i>l210w</i>           | 1 (0.87)                           | 0                        | 0                         |
| <b>PI mutations</b>    |                                    |                          |                           |
| <i>m46i</i>            | 7 (6.09)                           | 0                        | 13.64                     |
| <i>v82a</i>            | 4 (3.48)                           | 0                        | 9.09                      |
| <i>i54v</i>            | 3 (2.61)                           | 0                        | 6.82                      |
| <i>l76v</i>            | 3 (2.61)                           | 0                        | 6.82                      |
| <i>i84v</i>            | 1 (0.87)                           | 0                        | 2.27                      |

ART, antiretroviral therapy; NNRTI, non-nucleoside reverse transcriptase inhibitor; NRTI, nucleoside reverse transcriptase inhibitor; PI, protease inhibitor; TAMs, thymidine analogue mutations

**Additional file 1: Table S4** Relationship between patient characteristics and acquired drug resistance using multivariate logistic regression

| <b>Variable</b>                                   | <b>OR</b> | <b>95% CI</b> | <b>p-value</b> |
|---------------------------------------------------|-----------|---------------|----------------|
| Sex                                               | 1.20      | 0.23 – 6.18   | 0.829          |
| Age (per 1-year increase)                         | 0.91      | 0.83 – 0.99   | 0.027          |
| CD4 count (per 50 cells/mm <sup>3</sup> increase) | 0.82      | 0.69 – 0.96   | 0.013          |
| Viral load (log <sub>10</sub> copies/mL)          | 0.73      | 0.32 – 1.65   | 0.444          |
| Duration on ART (per 1-year increase)             | 1.00      | 0.98 – 1.03   | 0.771          |

ART, antiretroviral therapy; OR, adjusted odds ratio; CI, confidence interval
